# Supplementary material for: Characterisation and performance of hydrotalcite-derived CoMo sulphide catalysts for selective HDS in the presence of olefin
Source: Royal Society of Chemistry journal article supplement (doi:10.1039/c8cy01855c), 2018-01-01

## **Characterisation and Performance of Hydrotalcite-Derived CoMo Sulphide Catalysts for Selective HDS in the Presence of Olefin**

Tiago L. Coelho<sup>1,4</sup>, Santiago Arias<sup>2</sup>, Victor O. Rodrigues<sup>1</sup>, Sandra S. X. Chiaro<sup>3</sup>, Laetitia Oliviero<sup>4</sup>,  
Françoise Maugé<sup>4</sup>, Arnaldo C. Faro Jr.<sup>1\*</sup>

<sup>1</sup> *Universidade Federal do Rio de Janeiro, Instituto de Química, Av. Athos da Silveira Ramos, 149, Bl. A, CEP: 21941-909 Cidade Universitária, Rio de Janeiro – RJ – Brazil*

<sup>2</sup> *Universidade do Estado do Rio de Janeiro, Instituto de Química, R. São Francisco Xavier, 524, CEP: 20550-900 Rio de Janeiro – RJ – Brazil*

<sup>3</sup> *Centro de Pesquisas e Desenvolvimento Leopoldo Américo Miguez de Mello, PETROBRAS, Ilha do Fundão, CEP: 21941-598 – Rio de Janeiro, RJ – Brazil.*

<sup>4</sup> *Laboratoire Catalyse et Spectrochimie, ENSICAEN, Université de Caen Basse Normandie, CNRS, 6, bd du Maréchal Juin, 14050 Caen, France.*

*\*Corresponding author. E-mail address: farojr@iq.ufrj.br*

### Supplementary Material

**Figure. SM1.** Hydrodesulphurisation vs. reaction time for Co<sub>24</sub>Mg<sub>2</sub>Mo<sub>43</sub>-S catalyst, under different WHSVs (58 and 36 h<sup>-1</sup>).

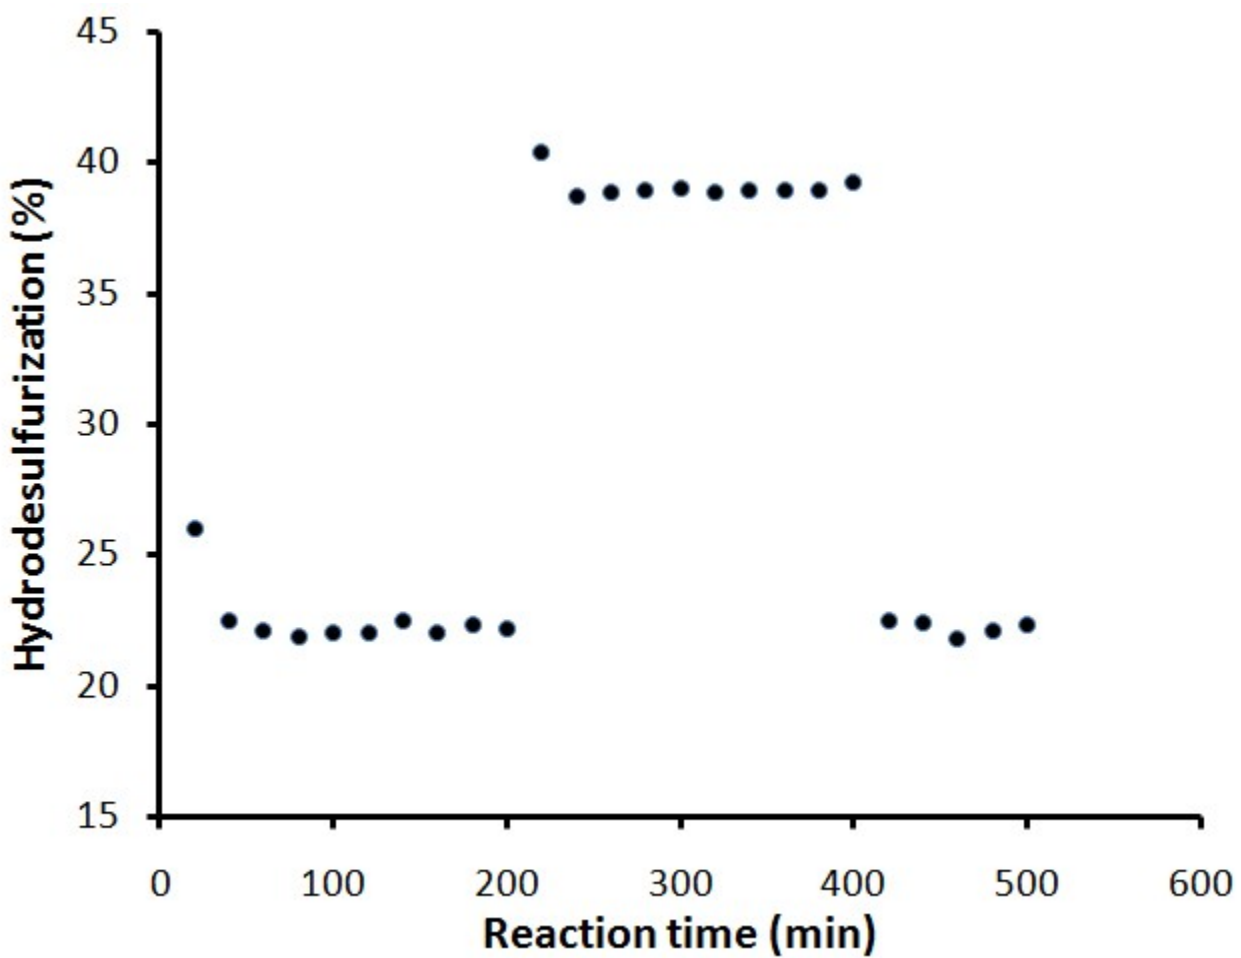

**Figure. SM2.** Scheme of passivation process.

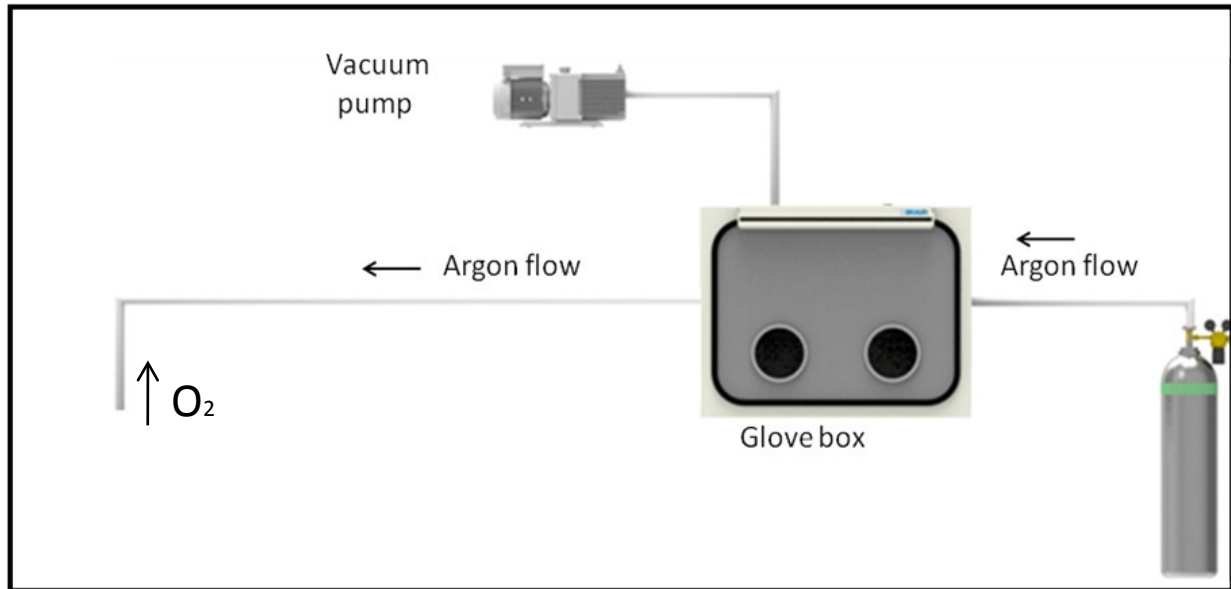

Figure SM3. Duplicate IR/CO experiments for all sulphides.

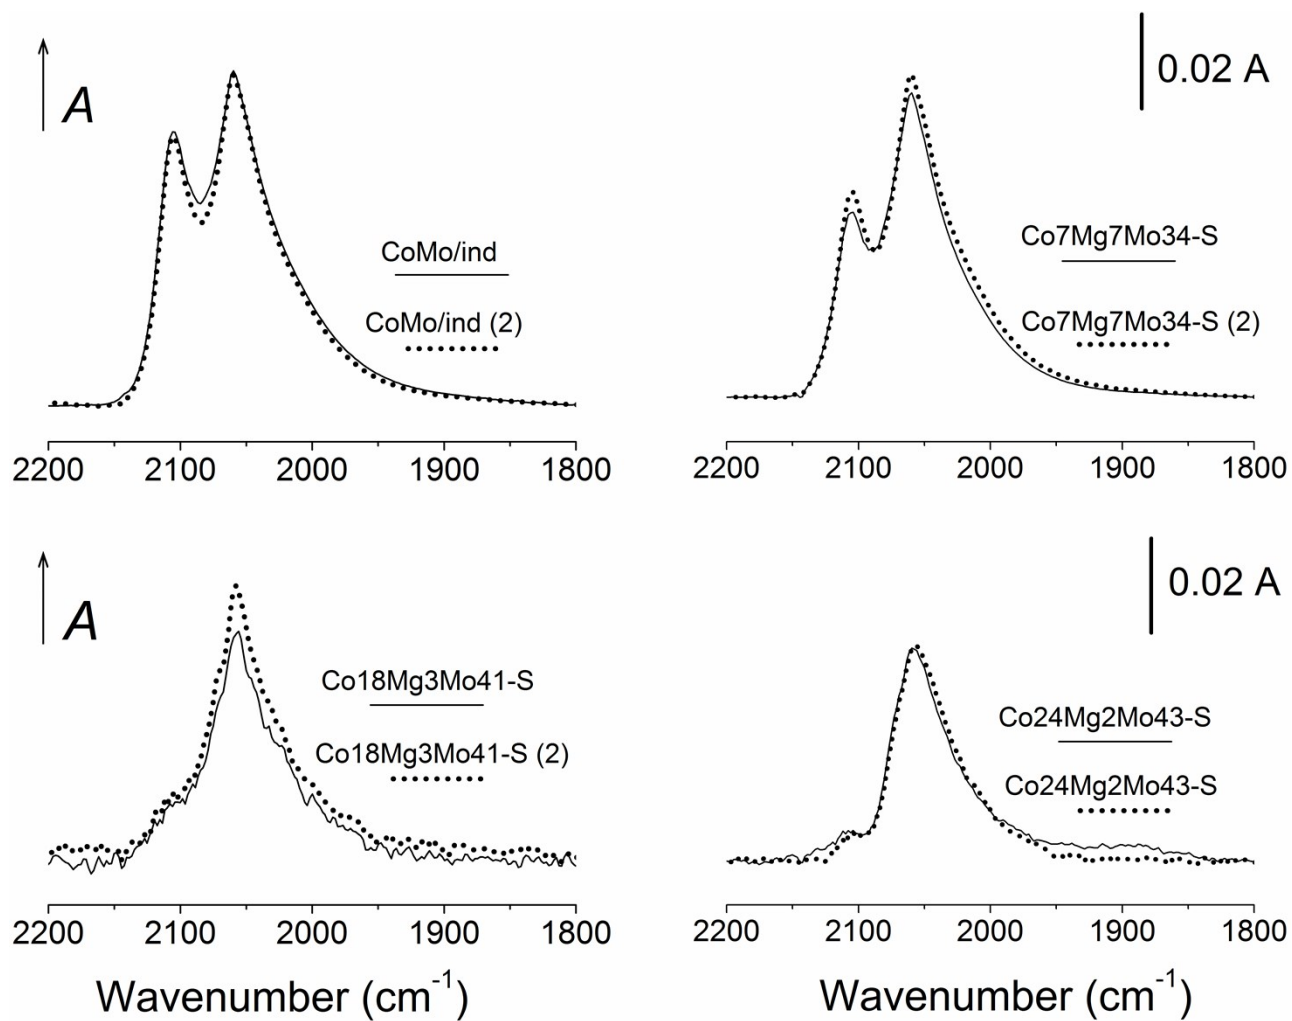

**Figure SM4.** CO/IR experiment at room temperature for HR306 sample.

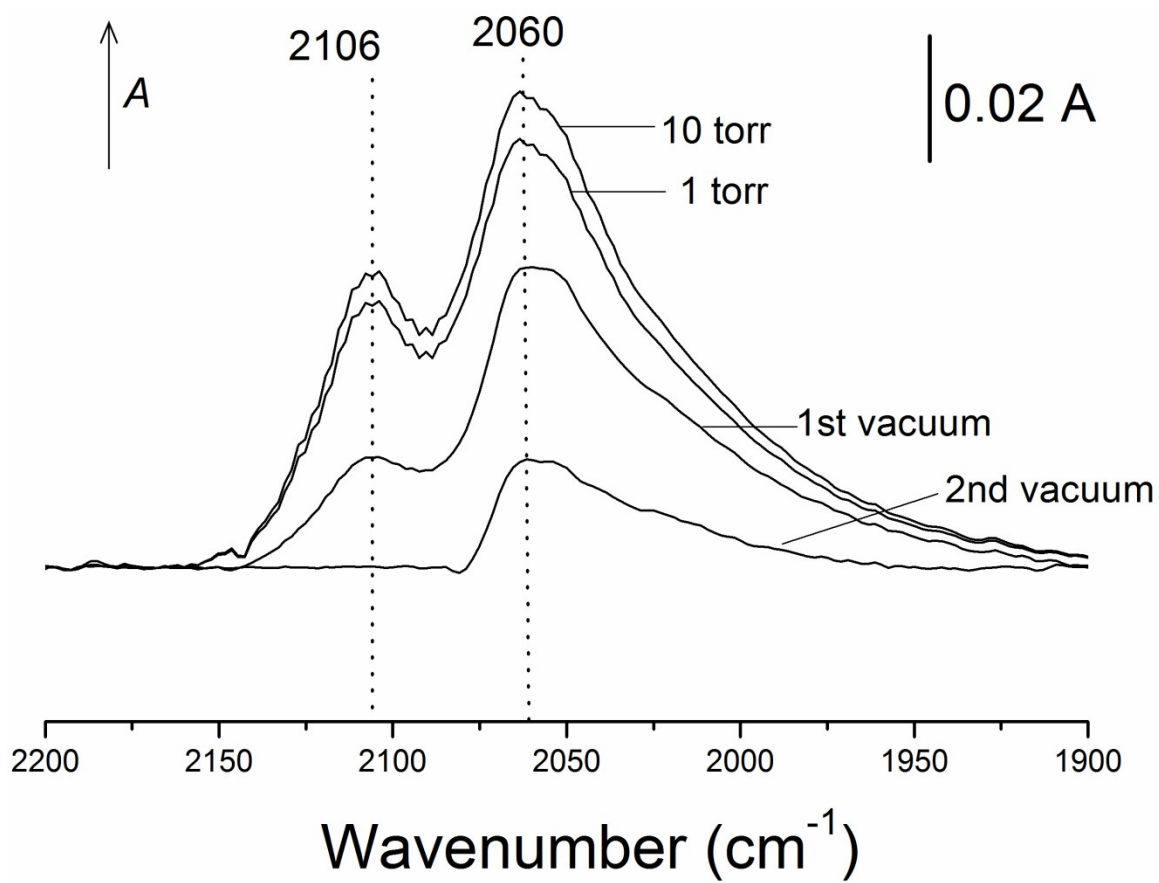

Figure SM5. Powder X-ray diffraction patterns for sulphides.

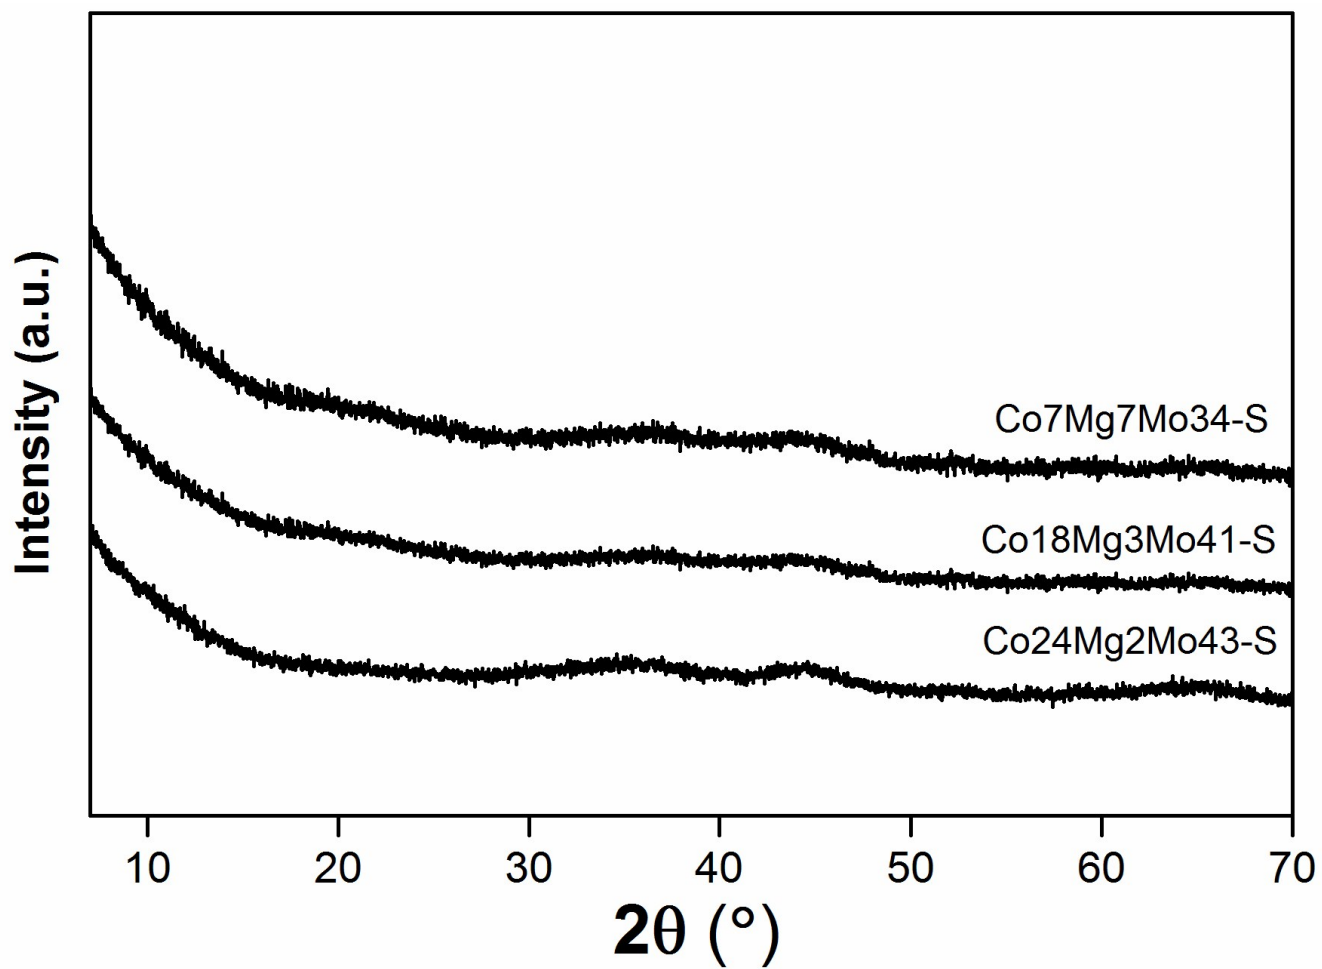

**Figure SM6.** Nitrogen adsorption-desorption isotherms for sulphide catalysts.

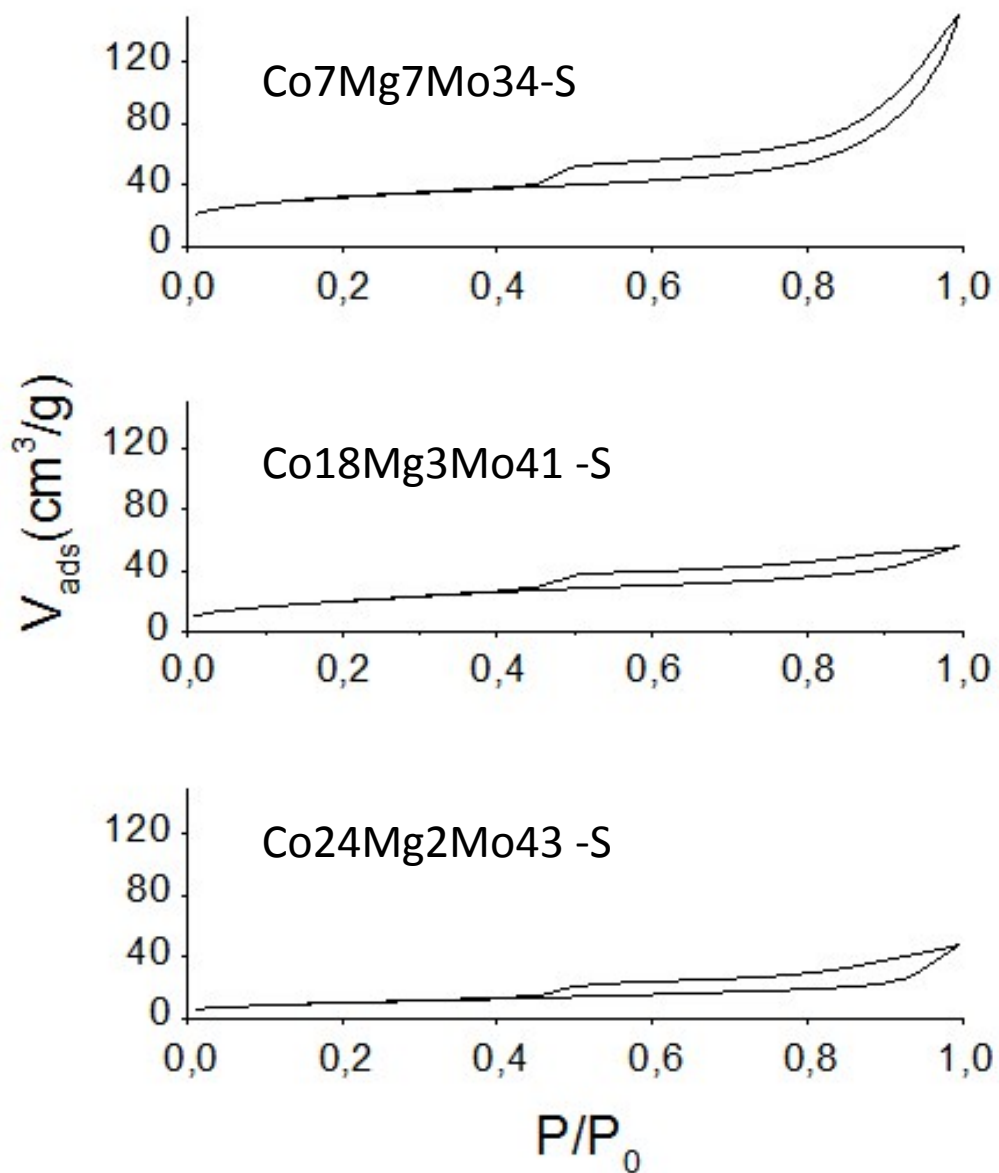

**Figure SM7.** XANES spectra of the oxide precursors (a) Co K-edge and (b) Mo K-edge. (I)  $\text{Co}_7\text{Mg}_7\text{Mo}_3$  (II)  $\text{Co}_{18}\text{Mg}_3\text{Mo}_4$  (III)  $\text{Co}_{24}\text{Mg}_2\text{Mo}_4$ .

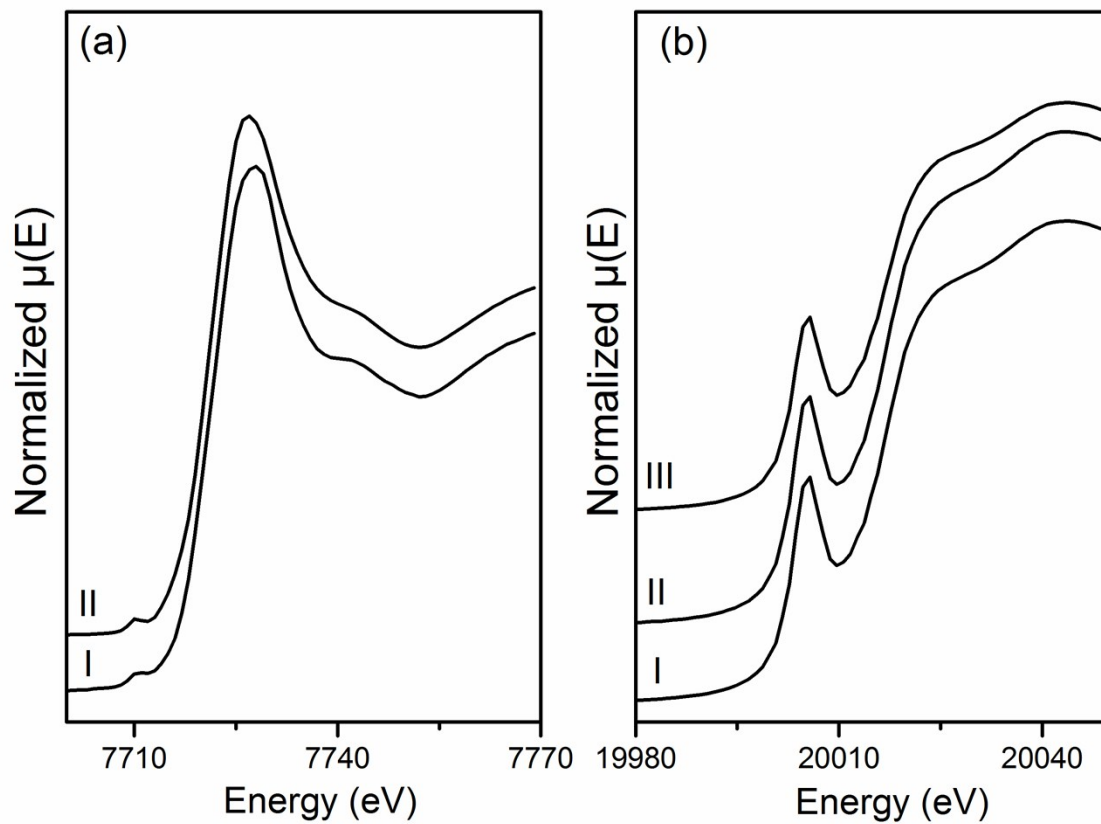



**Figure SM8.** Fitted XANES curves using a least-squares method for all samples at Mo K-edge.

Co<sub>7</sub>Mg<sub>7</sub>Mo<sub>34</sub>-S (a) before re-sulphidation (b) after re-sulphidation. Co<sub>18</sub>Mg<sub>3</sub>Mo<sub>41</sub>-S (c) before re-sulphidation (d) after re-sulphidation. Co<sub>24</sub>Mg<sub>2</sub>Mo<sub>43</sub>-S (e) before re-sulphidation (f) after re-sulphidation. CoMo/ind (g) before re-sulphidation (h) after re-sulphidation.

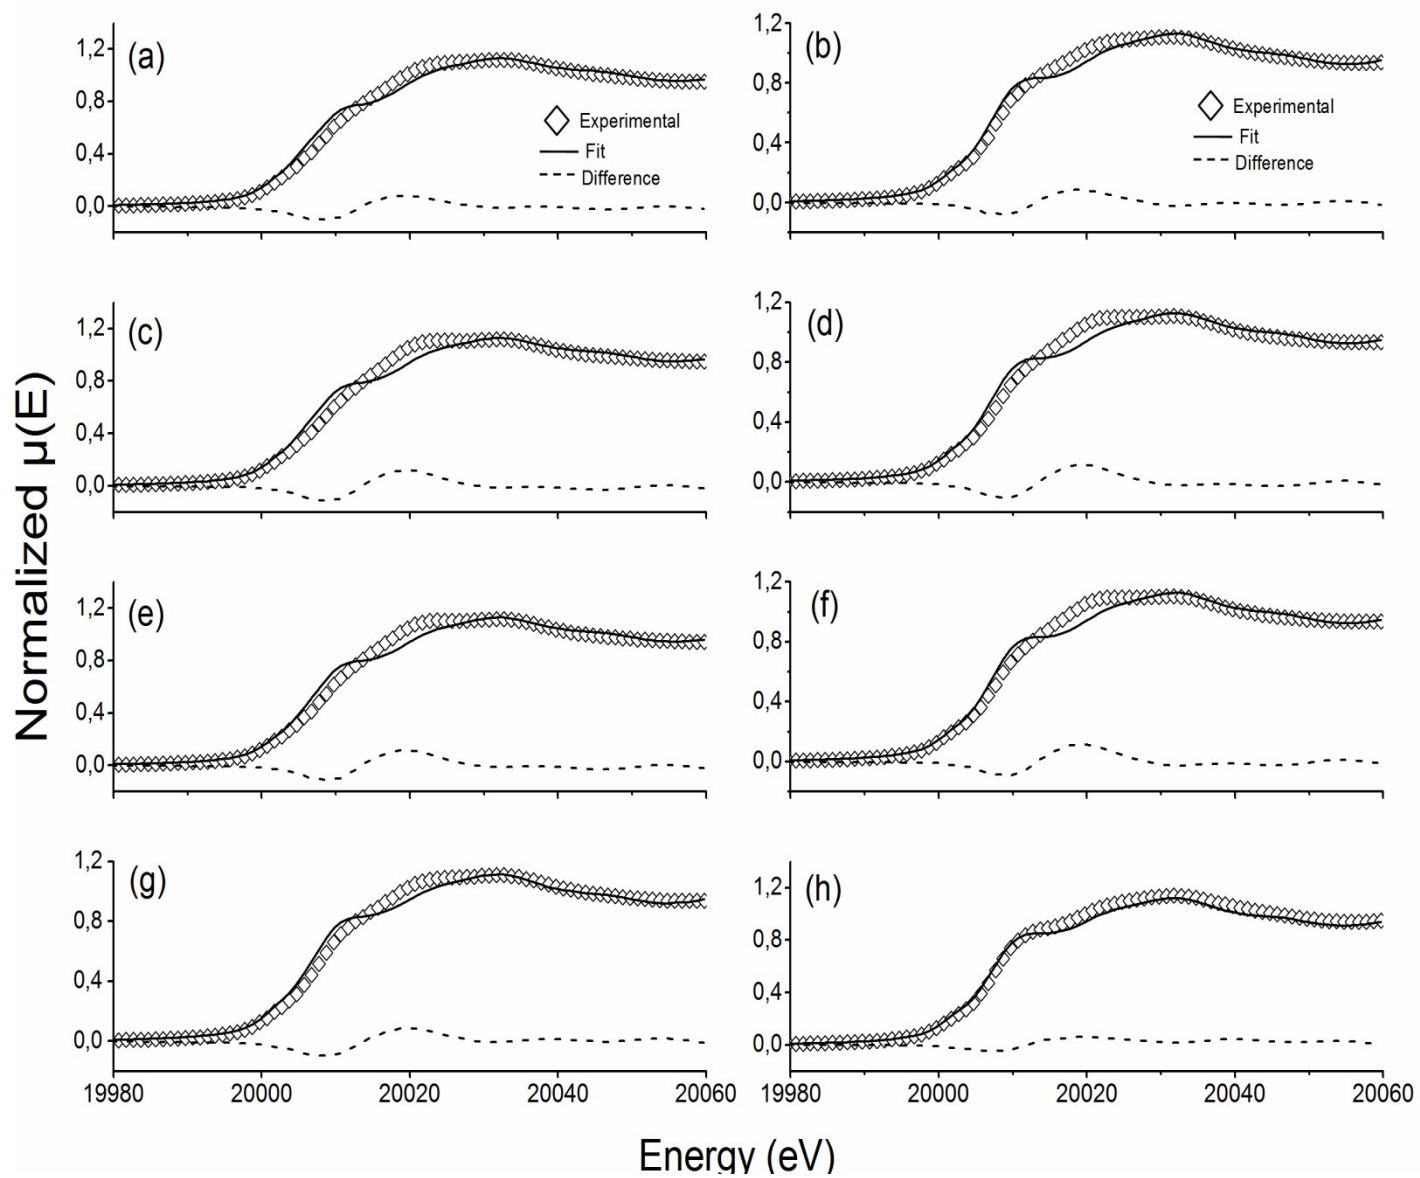

**Figure SM9.** Fitted XANES curves using a least-squares method for all samples at Co K-edge.

Co7Mg7Mo34-S (a) before re-sulphidation (b) after re-sulphidation. Co18Mg3Mo41-S (c) before re-sulphidation (d) after re-sulphidation. Co24Mg2Mo43-S (e) before re-sulphidation (f) after re-sulphidation. CoMo/ind (g) before re-sulphidation (h) after re-sulphidation.

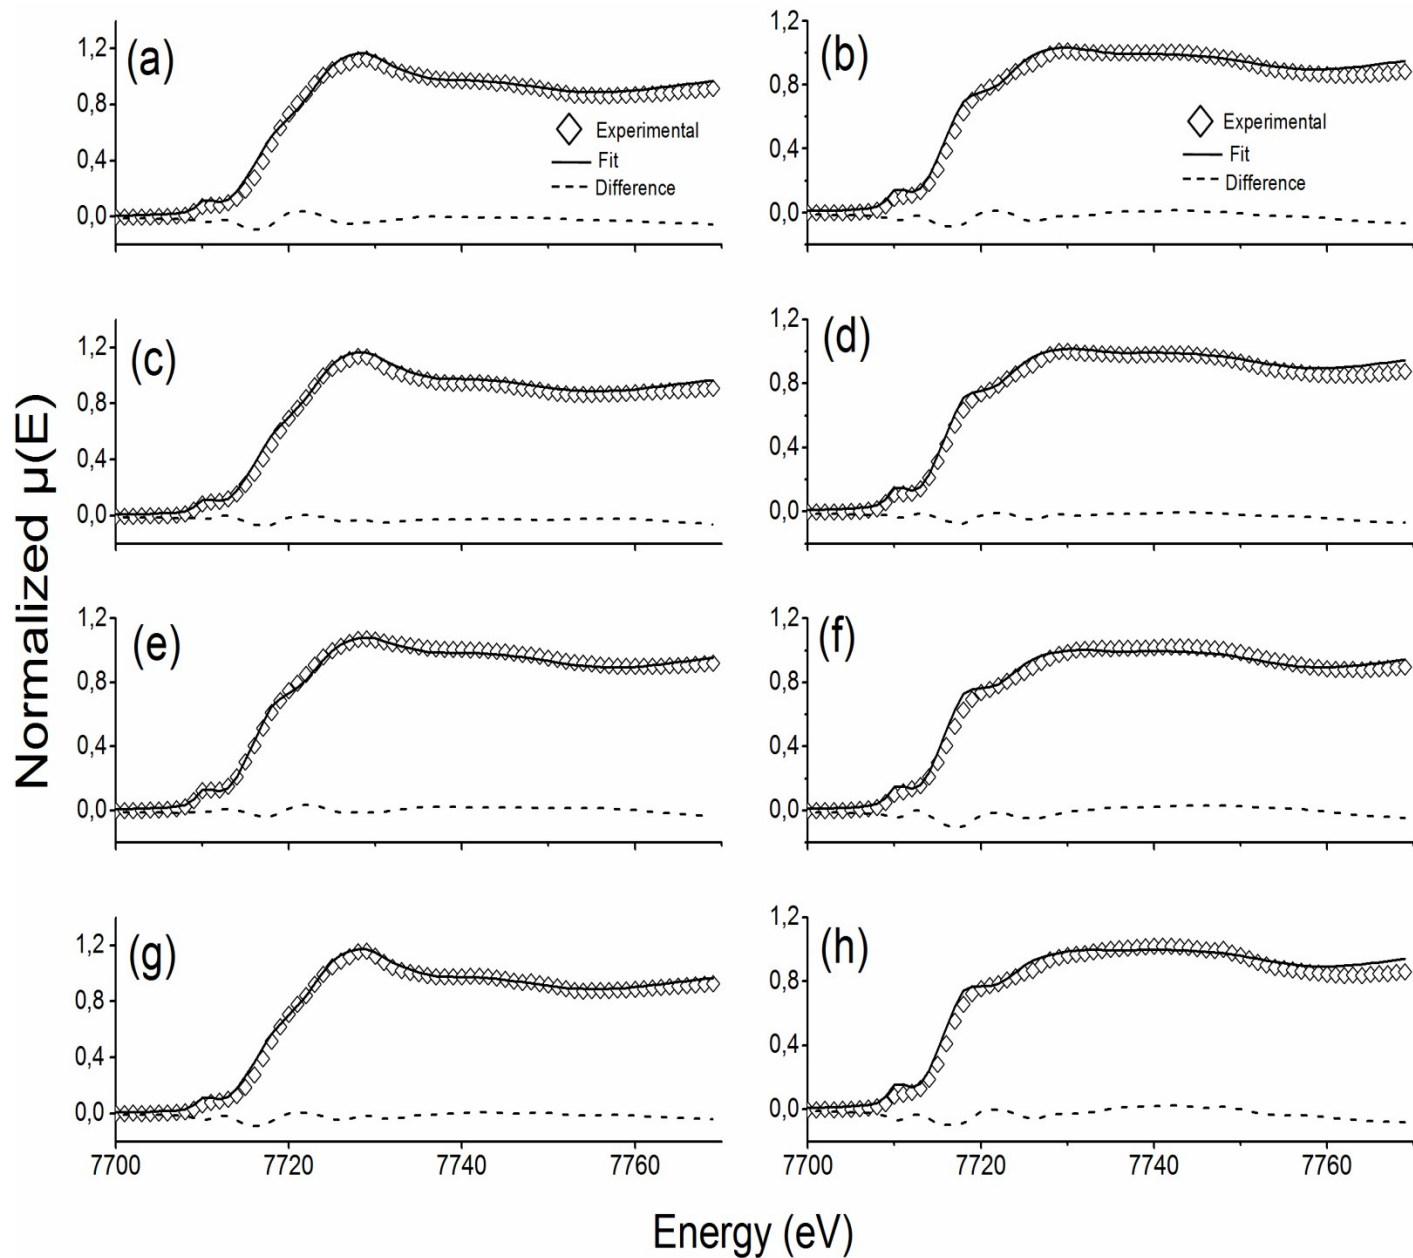

**Figure SM10.** TEM analysis of Co<sub>24</sub>Mg<sub>2</sub>Mo<sub>43</sub>-S catalyst. On the right the area was magnified.

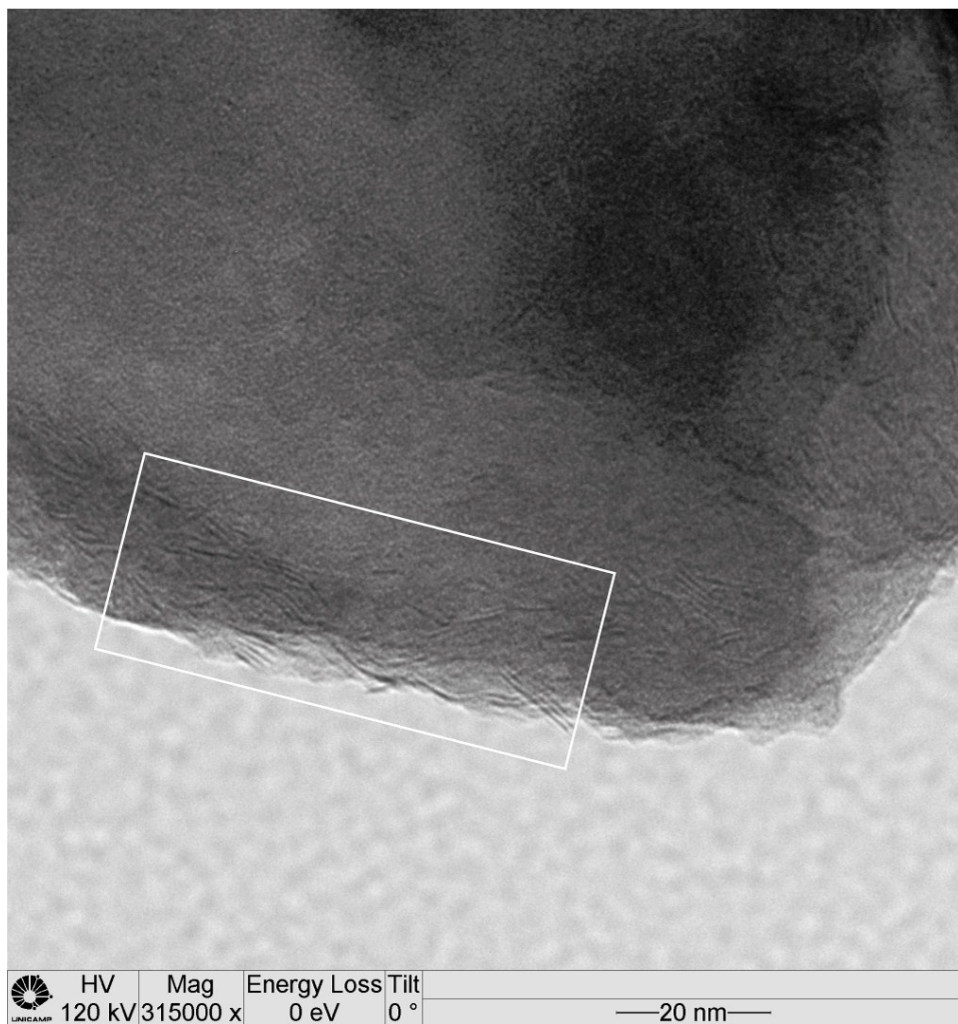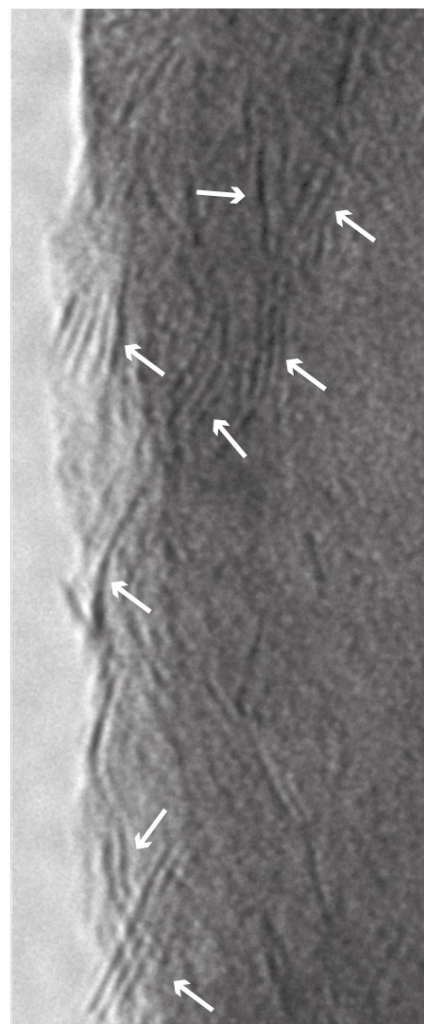

**Figure SM11.** Fitted XANES curves using an iterative alternating least-square method for all samples, at Mo K-edge. Co<sub>7</sub>Mg<sub>7</sub>Mo<sub>34</sub>-S (a) before re-sulphidation (b) after re-sulphidation. Co<sub>18</sub>Mg<sub>3</sub>Mo<sub>41</sub>-S (c) before re-sulphidation (d) after re-sulphidation. Co<sub>24</sub>Mg<sub>2</sub>Mo<sub>43</sub>-S (e) before re-sulphidation (f) after re-sulphidation. CoMo/ind (g) before re-sulphidation (h) after re-sulphidation.

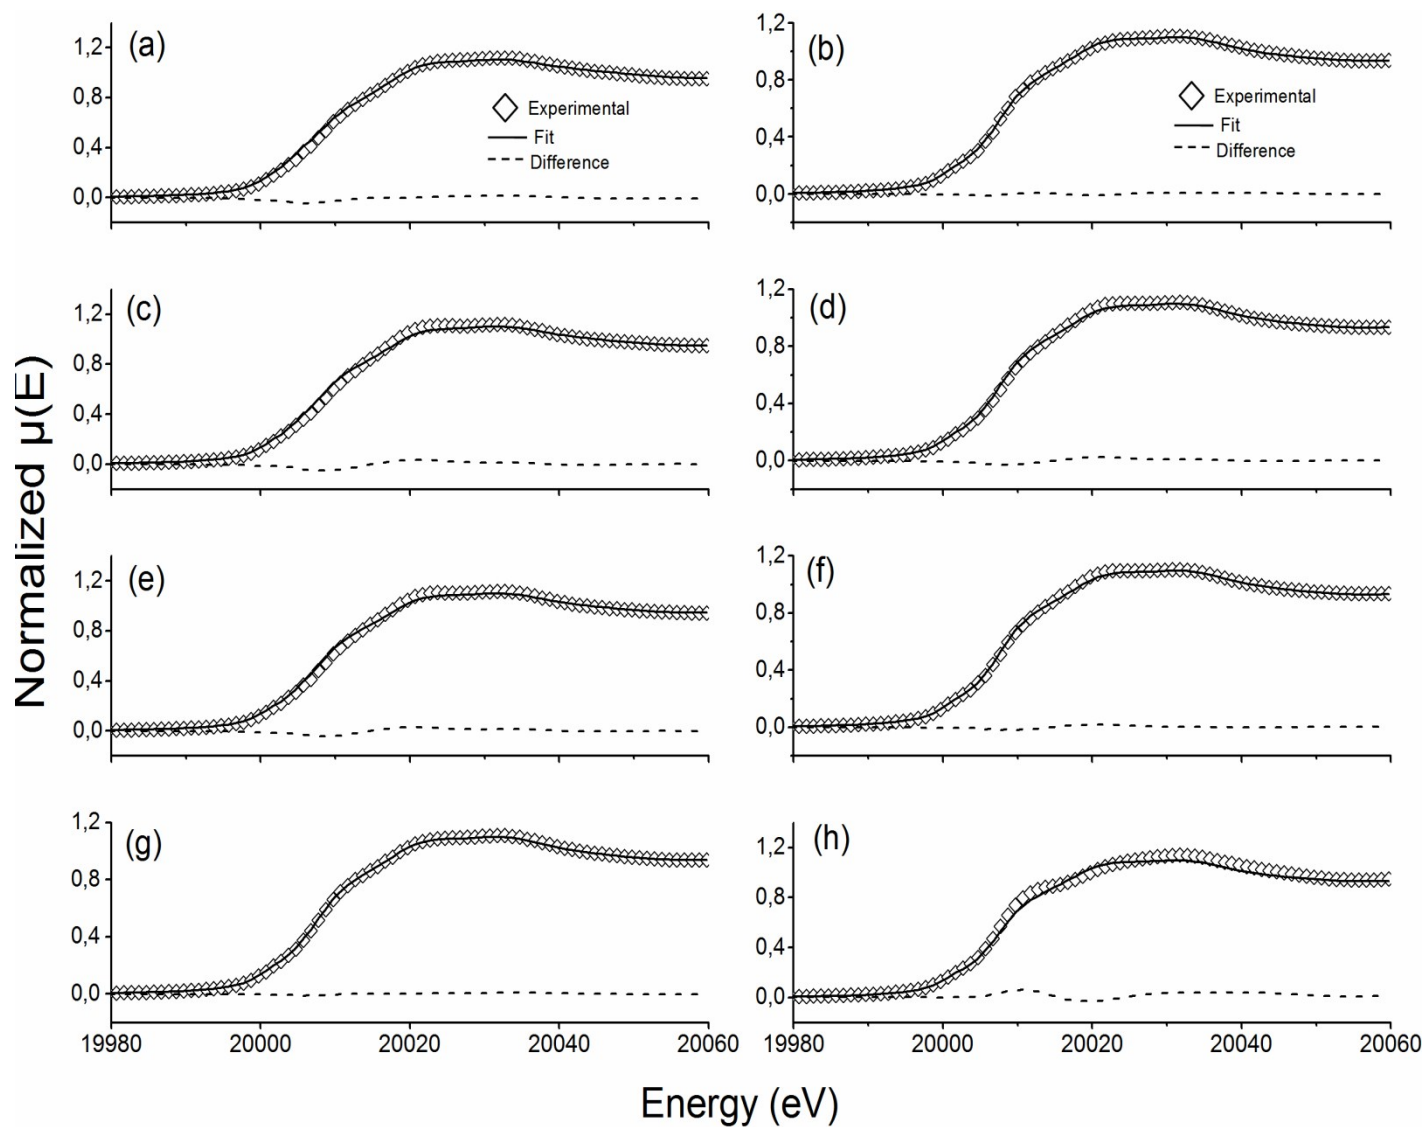

**Figure SM12.** Fitted XANES curves using an iterative alternating least-square method for all samples, at Co K-edge. Co<sub>7</sub>Mg<sub>7</sub>Mo<sub>34</sub>-S (a) before re-sulphidation (b) after re-sulphidation. Co<sub>18</sub>Mg<sub>3</sub>Mo<sub>41</sub>-S (c) before re-sulphidation (d) after re-sulphidation. Co<sub>24</sub>Mg<sub>2</sub>Mo<sub>43</sub>-S (e) before re-sulphidation (f) after re-sulphidation. CoMo/ind (g) before re-sulphidation (h) after re-sulphidation.

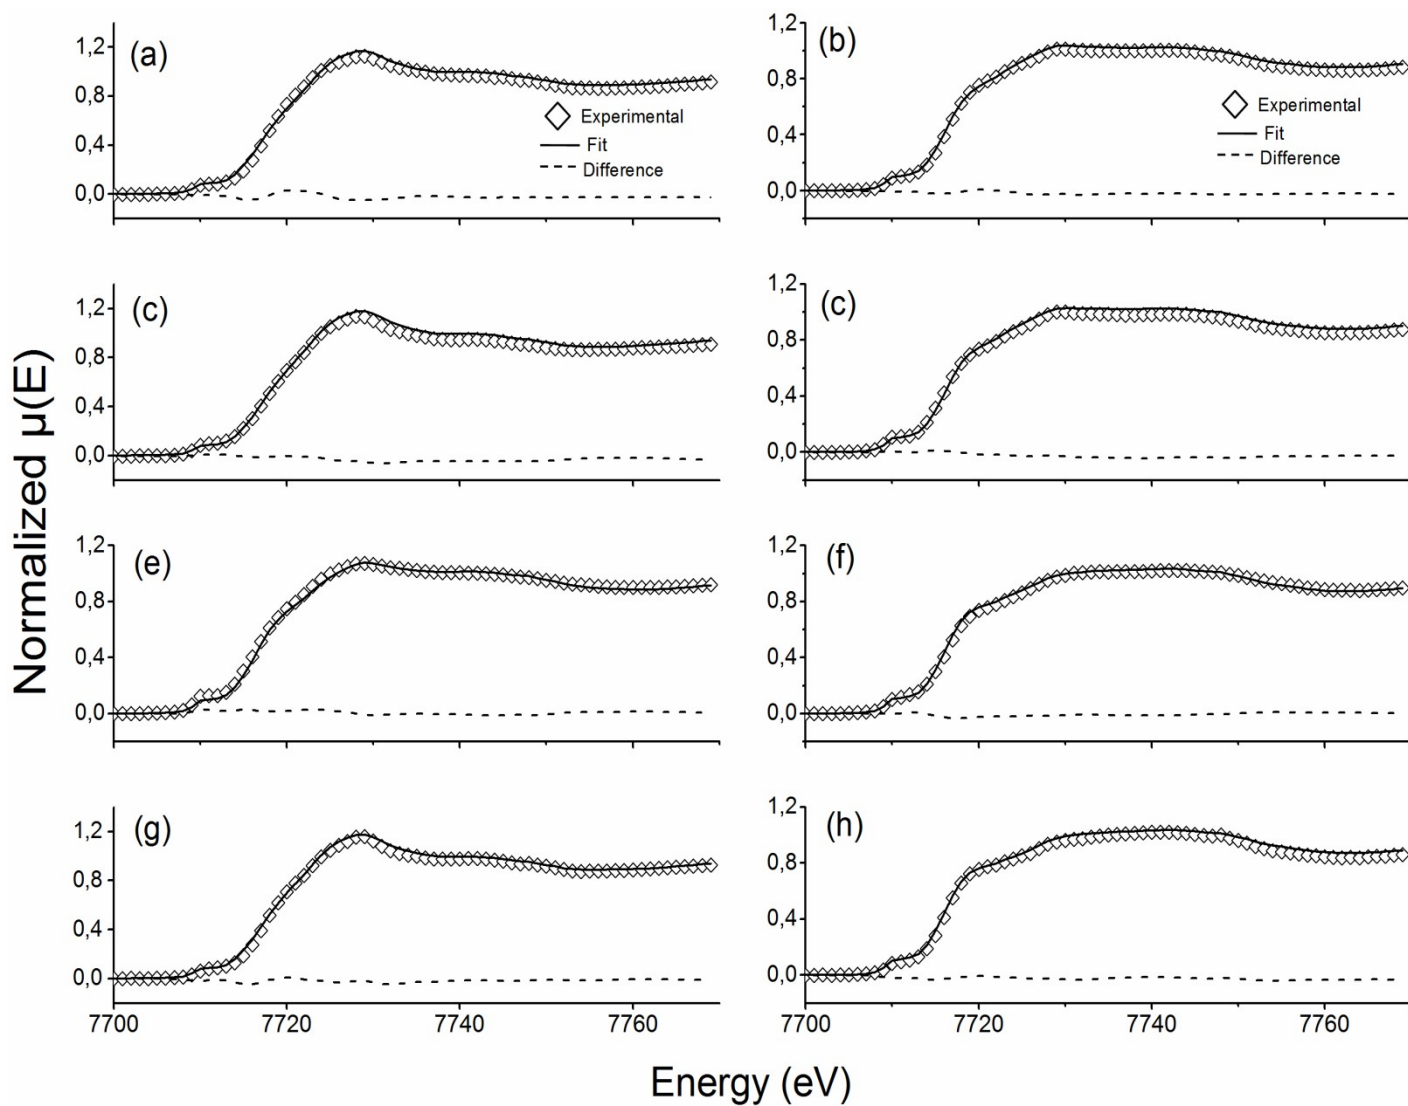

**Figure SM13.** Relationship between (a) HDS and (b) OHYD and space time.

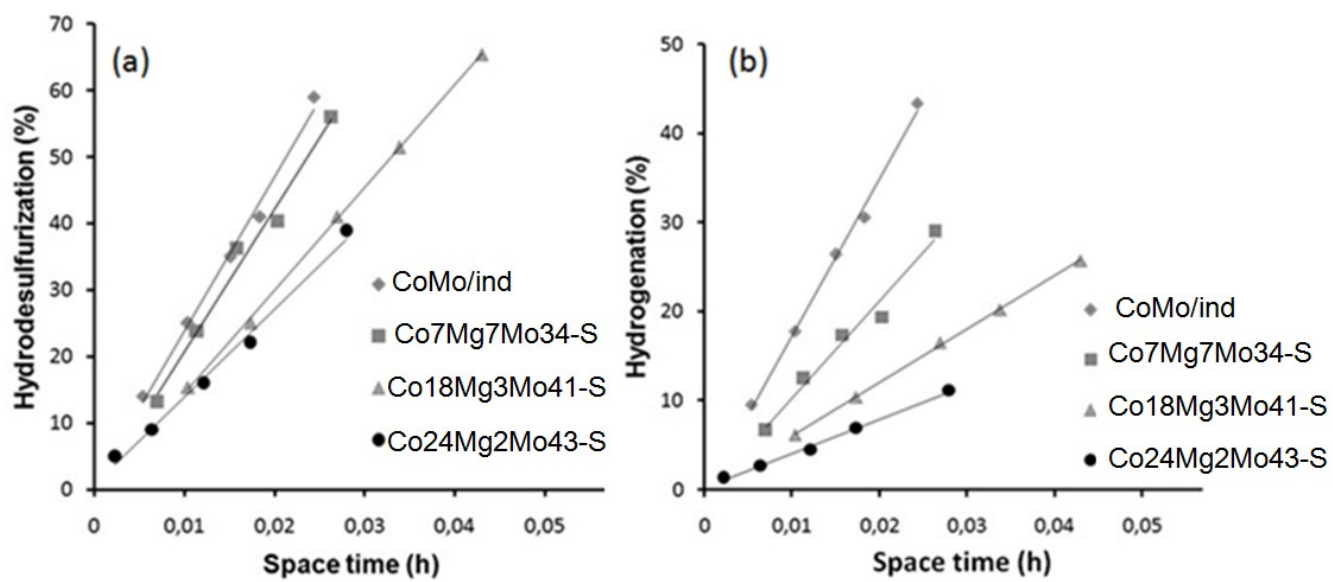

Supplement: c8cy01855c1.pdf [file c8cy01855c1.pdf]
